# Supplementary material
Source: publisher figshare collection journal article supplement (https://karger.figshare.com/ndownloader/files/27922455)
Supplement: Supplementary file 1 [file 27922455]

**Supplementary Table 2.** Results of the reclassification analysis concerning the new risk models in relation to the original score for the risk definition of in-hospital and post discharge mortality

|  | **N** | **RFM** | **RFL** | **NRI** | **z-value/P-value** |
| --- | --- | --- | --- | --- | --- |
| **In-Hospital Mortality** |  | | | | |
|  | **CHA2DS2-VASc-R1** | | | | |
| Events | 37 | 4 | 0 |  |  |
| Non events | 871 | 63 | 0 |  |  |
| Total | 908 | 67 | 0 | 3.6 | 0.58/0.28 |
|  | **CHA2DS2-VASc-R2** | | | | |
| Events | 37 | 9 | 0 |  |  |
| Non events | 871 | 102 | 0 |  |  |
| Total | 908 | 111 | 0 | 12.6 | 1.55/0.06 |
|  | **CHA2DS2-VASc-R3** | | | | |
| Events | 37 | 8 | 0 |  |  |
| Non events | 871 | 66 | 0 |  |  |
| Total | 908 | 74 | 0 | 14 | 1.8/0.035 |
| **Post Discharge Mortality** |  | | | | |
|  | **CHA2DS2-VASc-R1** | | | | |
| Events | 39 | 11 | 0 |  |  |
| Non events | 826 | 52 | 0 |  |  |
| Total | 865 | 63 | 0 | 21.8 | 2.59/0.01 |
|  | **CHA2DS2-VASc-R2** | | | | |
| Events | 39 | 16 | 0 |  |  |
| Non events | 826 | 86 | 0 |  |  |
| Total | 865 | 102 | 0 | 31 | 3.1/0.002 |
|  | **CHA2DS2-VASc-R3** | | | | |
| Events | 39 | 13 | 0 |  |  |
| Non events | 826 | 53 | 0 |  |  |
| Total | 865 | 66 | 0 | 26.6 | 2.98/0.002 |

CHA2DS2-VASc-R1 = eGFR <60 ml/min/1.73mq=1 point; CHA2DS2-VASc-R2 = eGFR <60 ml/min/1.73mq=2 points; CHA2DS2-VASc-R3 = eGFR <60 ml/min/1.73mq=1 point, <30 ml/min/1.73mq=2 points ; NRI = net reclassification index; RFL = reclassification for less; RFM = reclassification for more
